# Supplementary material
Source: PubMed Central journal article supplement (PMC1913795)
Supplement: plntphys_pp.106.092932_3.pdf [file plntphys_pp.106.092932_3.pdf]

## Supplementary Figure S3: Post-meiotic expression

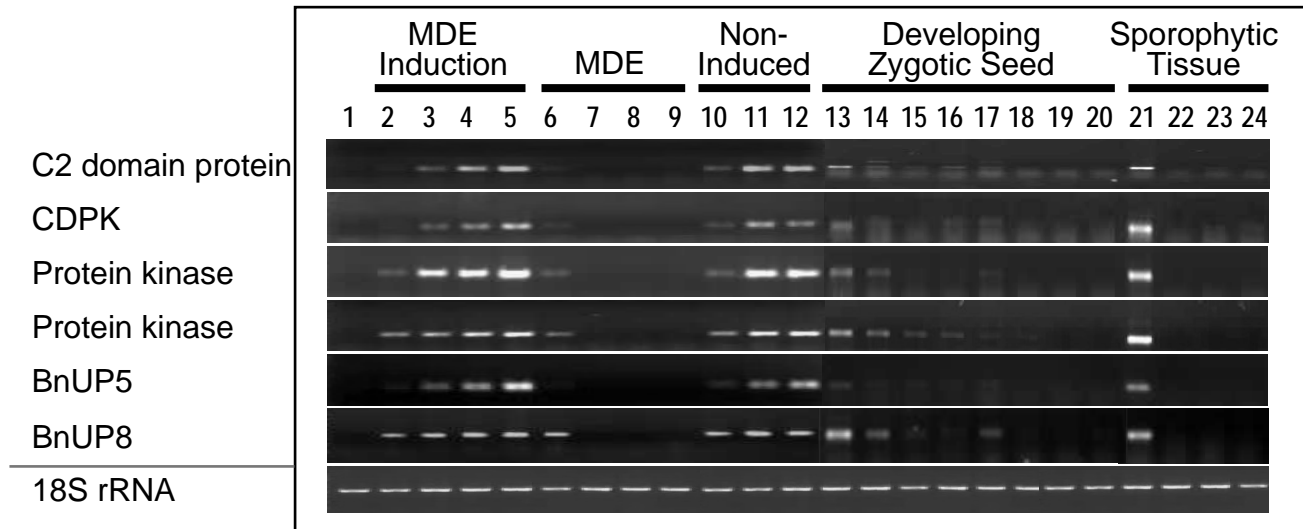

**Supplementary Figure S3.** Gene expression profiles of a C2 domain-containing protein (similar to At1g48590; e-121), calcium-dependent protein kinase (CDPK; similar to At2g31500; e-113), protein kinases (similar to At3g02810; e-124, AT2G24370; 2e-48), BnUP5 and BnUP8 (unknown proteins, no annotation). These genes showed expression in developing pollen, induction stage microspores (1d to 5d; lanes 2-5) and early zygotic embryos (0d to 7d; lanes 13-16), and in the young inflorescence. The expression patterns suggest an overlap in gene expression programs between the pollen and developing embryo (seed). This tissue collection series was the same as described previously for the semi-quantitative RT-PCR analyses of Figure 6.
